# Supplementary material for: Conversion surgery for stage IV gastric cancer: a multicenter retrospective study
Source: Springer Nature journal article supplement (doi:10.1186/s12893-022-01874-8), 2022-12-14
Supplement: MOESM1 [file 23826306]

# Supplementary Fig.

S1a

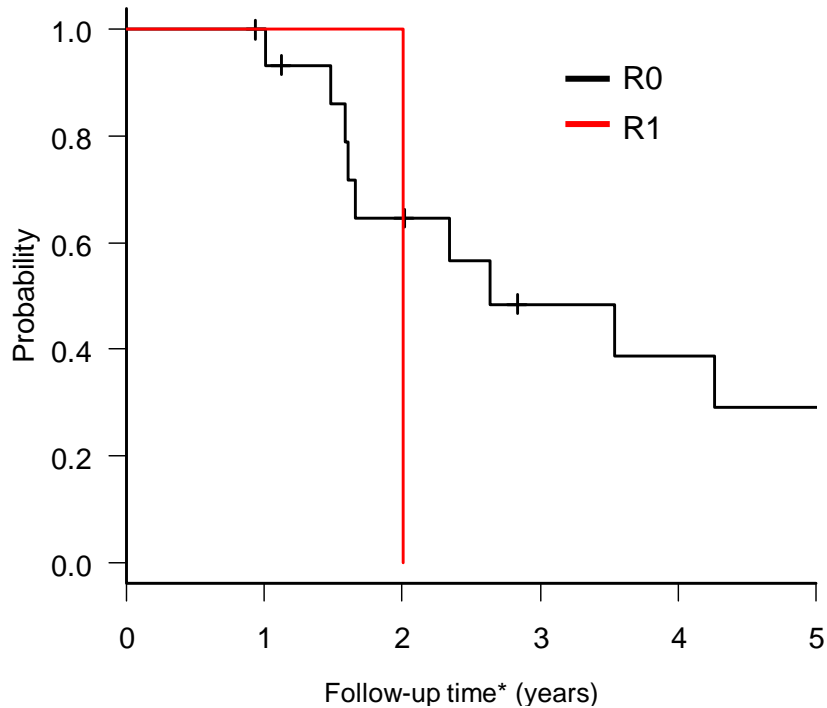

|    | Number at risk |    |   |   |   |   |
|----|----------------|----|---|---|---|---|
|    | 0              | 1  | 2 | 3 | 4 | 5 |
| R0 | 16             | 15 | 9 | 5 | 4 | 3 |
| R1 | 1              | 1  | 1 | 0 | 0 | 0 |

S1b

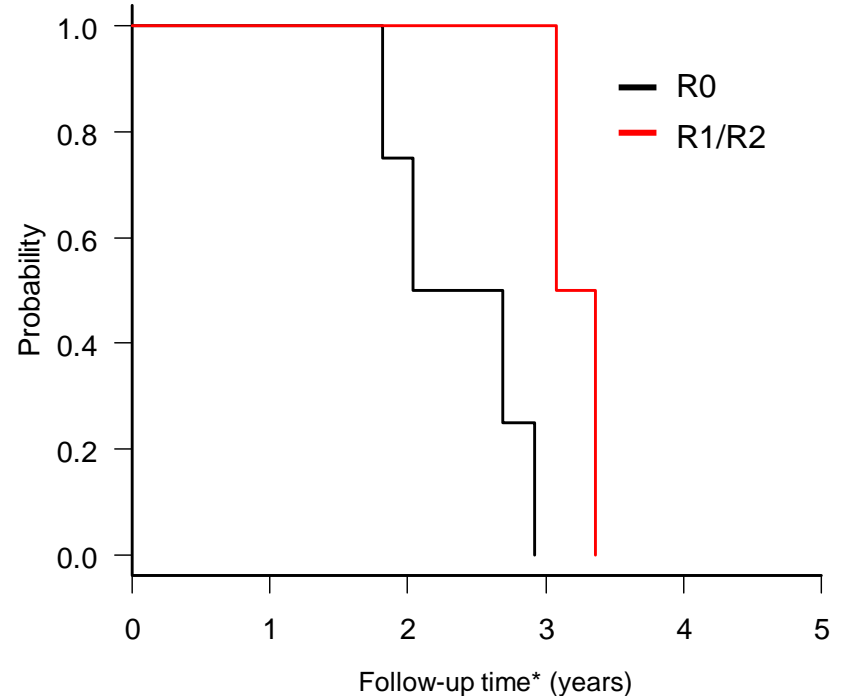

|       | Number at risk |   |   |   |   |   |
|-------|----------------|---|---|---|---|---|
|       | 0              | 1 | 2 | 3 | 4 | 5 |
| R0    | 4              | 4 | 3 | 0 | 0 | 0 |
| R1/R2 | 2              | 2 | 2 | 2 | 0 | 0 |

**Supplementary figure 1.** Kaplan–Meier survival curves for patients with category 2 (a, N = 17) and category 4 (b, N = 6) stage IV gastric cancer stratified by the residual tumor status after conversion surgery. \* Follow-up time: time from the start of initial chemotherapy to the date of death or of the last follow-up visit

Category 2 = distant metastasis that are regarded as technically and oncologically unresectable tumor without peritoneal dissemination. Category 4 = macroscopic peritoneal dissemination with other distant metastasis.
